# Supplementary material for: An Empirical Investigation of Private Label Supply by National Label Producers
Source: Atypon-hosted journal article supplement (doi:10.1287/mksc.1090.0554), 2010-04-09
Supplement: mksc.1090.0554-sm-technical_appendix.pdf [file mksc.1090.0554-sm-technical_appendix.pdf]

## **Online Technical Appendix To Accompany “An Empirical Investigation of Private Label Supply by National Label Producers”**

In the technical appendix we describe in detail the various supply games that we estimate, which corresponds to Sections 2.3 and 4.3.2 in the text. We also explain the approach used to selected the most appropriate game form (Section 4.3.2 in the text), and display the elasticity matrix derived from our demand estimates (Section 4.3.1 in the text). In order to make the Technical Appendix as self-contained as possible, we occasionally reproduce some of the material from the text, including the relevant references.

### **SUPPLY GAMES**

At the retail market, the products sold include both national brands and two kinds of private labels (skim milk and whole milk) for each retailer. We denote the set of products at retailer  $r$  as  $F_r$ ; thus, the full set of products in the retail market as  $F_R = \cup F_r$  with measure  $N_R$ . Denote the set of national brands and private labels at retail level as  $F_R^n$  and  $F_R^b$  respectively<sup>1</sup>. Given the two types of products (skim and whole milk), denote  $F_R^{n1}$  and  $F_R^{n2}$  as the sets of these two types of NL products at the retail level, and  $F_R^{b1}$  and  $F_R^{b2}$  as the corresponding sets of PL products at the retail level. Note that superscript 1 denotes skim while 2 denotes whole milk. By definition,  $F_R = F_R^n \cup F_R^b$ ,  $F_R^n = F_R^{n1} \cup F_R^{n2}$ , and  $F_R^b = F_R^{b1} \cup F_R^{b2}$ . Finally, we use  $q_j$  and  $p_j$  to represent the quantity and price of brand  $j$  in the retail market.

In the wholesale market, we denote the set of NL products that manufacturer  $m$  sells as  $F_m^n$  with measure  $N_m^n$ , and the full set of NL products as  $F_M^n = \cup F_m^n$  with measure  $N_M^n$ . Let  $F_M^b$  denote the set of PL products supplied in the wholesale market with measure  $N_M^b$ . Since private labels are homogeneous products in the wholesale market, each manufacturer either supplies  $F_M^b$  or does not<sup>2</sup>. Let  $q_j^n$  and  $w_j^n$  represent the quantity and wholesale price for national brands,  $x_{mi}^b$  represent the quantity of private label  $i$  supplied by manufacturer  $m$ , and  $w_i^b$  the wholesale price for private label  $i$ .

#### **TA.1 Specifying The Retailer’s Problem**

The retailers maximize their category profit,

---

<sup>1</sup> NL and PL products carry the  $n$  and  $b$  superscripts respectively.

<sup>2</sup> We constrain each manufacturer to either supply both whole and skim private label milk, or neither. This reflects our institutional context – no producer in this market focuses on one kind of milk exclusively.

$$\text{Max}_{p_j, j \in F_r} \Pi_r = \sum_{j \in F_r} (p_j - w_j) q_j(p)$$

where  $q_j$  is the quantity and  $w_j$  is the wholesale price for product  $j$ ;  $p$  is a vector of retail prices.

The first order conditions are:

$$q_j + \sum_{k \in F_r} (p_k - w_k) \frac{\partial q_k}{\partial p_j} = 0 \quad \forall j \in F_r \quad (1)$$

Written in matrix form, the price-cost margins for all retailers ( $R$ ) are

$$\text{PCM}^R = p - w = -(T_R \square \Delta_1)^{-1} q \quad (2)$$

where  $p$ ,  $w$ , and  $q$  are vectors for retail price, wholesale price, and quantity respectively.  $\Delta_1$  is an  $N_R \times N_R$  matrix of marketing response to retail price, with

$$\Delta_1(i, j) = \frac{\partial q_j}{\partial p_i} \quad \forall i, j \in F_R$$

We show how to calculate  $\Delta_1$  in section TA3.  $T_R$  is an  $N_R \times N_R$  matrix indicating the retailer's pricing strategy; in the category maximization case,  $T_R(i, j) = 1 \quad \forall i, j \in F_r$ . Finally,  $T_R \cdot \Delta_1$  is the element by element product of the matrices  $T_R$  and  $\Delta_1$ .

## TA.2 Specifying The Manufacturers' Problem

The model we specify has upstream manufacturers picking quantities for the private label and wholesale prices for the national brand. Now, manufacturers can use various profit maximization strategies with respect to private labels and national brands.

In particular, we consider three cases: i) *Product management*, wherein the manufacturer maximizes profits separately for each 'product' in his portfolio. ii) *Account management*, wherein the manufacturer maximizes profits for NL products (viewed as one account) separately from PL products (viewed as a different account). iii) *Category management*, wherein the manufacturer maximizes joint profits across all products.

We next discuss the model for scenario (i) in detail. The other two scenarios are straightforward extensions of scenario (i).

In scenario (i), manufacturers maximize joint profits by choosing prices for national brands and quantities for the private label they supply:

*Manufacturers Who Supply Private Labels*: These manufacturers maximize profits by choosing prices for national brands and quantities for the private label they supply:

$$\text{Max}\Pi_m = \sum_{w_j^n, x_{mi}^b} w_j^n q_j^n + \sum_{i \in F_M^b} w_i^b x_{mi}^b - \sum_{j \in F_m^n} c_j^n q_j^n - \sum_{i \in F_M^b} c_i^b x_{mi}^b$$

where  $w_j^n$  is the wholesale price for national brand  $j$ ,  $w_i^b$  is the wholesale price for PL  $i$ ,  $c_j^n$  is the marginal cost for national brand  $j$ , and  $c_i^b$  is the marginal cost for PL  $i$ .

Note that  $w_i^b$  is endogenously determined by imposing the condition that markets clear, i.e.,

$$\sum_{m \in M} x_{mi}^b = \sum_{j \in F_R^{bi}} q_j(p(w^n, w^b)) \quad \text{for } i=1,2$$

Therefore, the PL wholesale prices can be considered as a function of the total quantity of private labels in the wholesale market, and the NL wholesale prices, i.e.,

$$w^b \left( \sum_{m \in M} x_{m1}^b, \sum_{m \in M} x_{m2}^b, w^n \right).$$

Hence, the first order conditions are:

$$\frac{\partial \Pi_m}{\partial w_k^n} = q_k^n + \sum_{j \in F_m^n} w_j^n \frac{\partial q_j^n}{\partial w_k^n} + \sum_{i \in F_M^b} \frac{\partial w_i^b}{\partial w_k^n} x_{mi}^b - \sum_{j \in F_m^n} c_j^n \frac{\partial q_j^n}{\partial w_k^n} = 0 \quad \forall k \in F_m^n \quad (3a)$$

$$\frac{\partial \Pi_m}{\partial x_{mk}^b} = \sum_{j \in F_m^n} w_j^n \frac{\partial q_j^n}{\partial x_{mk}^b} + w_k^b + \sum_{i \in F_M^b} \frac{\partial w_i^b}{\partial x_{mk}^b} x_{mi}^b - \sum_{j \in F_m^n} c_j^n \frac{\partial q_j^n}{\partial x_{mk}^b} - c_k^b = 0 \quad \forall k \in F_M^b \quad (3b)$$

In the above,

$$\frac{\partial q_j^n}{\partial w_k^n} = \sum_{l \in F_R} \frac{\partial q_j^n}{\partial p_l} \frac{\partial p_l}{\partial w_k^n}$$

$$\frac{\partial q_j^n}{\partial x_{mk}^b} = \sum_{l \in F_R} \frac{\partial q_j^n}{\partial p_l} \sum_{i \in F_M^b} \frac{\partial p_l}{\partial w_i^b} \frac{\partial w_i^b}{\partial x_{mk}^b}$$

Manufacturers Who Don't Supply Private Labels: These manufacturers maximize profits by choosing prices for their NL products, i.e.,

$$\text{Max}\Pi_m = \sum_{w_j^n} w_j^n q_j^n - \sum_{j \in F_m^n} c_j^n q_j^n$$

The first order conditions are obtained from equation 3a by setting terms involving  $w^b$  to zero:

$$\frac{\partial \Pi_m}{\partial w_k^n} = q_k^n + \sum_{j \in F_m^n} w_j^n \frac{\partial q_j^n}{\partial w_k^n} - \sum_{j \in F_m^n} c_j^n \frac{\partial q_j^n}{\partial w_k^n} = 0 \quad \forall k \in F_m^n \quad (4)$$

With expressions 3a, 3b, and 4 in place, we can now derive the manufacturers' price cost margins for both national brands and private labels, in matrix form.

Matrix Expression for Manufacturer Price Cost Margins: Consider national brands first. It is straightforward to combine equation 3a and 4 as:

$$\sum_{j \in F_m^n} (w_j^n - c_j^n) \frac{\partial q_j^n}{\partial w_k^n} = - \left( q_k^n + \phi(m) \sum_{i \in F_M^b} \frac{\partial w_i^b}{\partial w_k^n} x_{mi}^b \right)$$

where  $\phi(m)$  is an indicator function to reflect whether manufacturer  $m$  supplies private labels or not. Define an  $N_M^n \times 1$  matrix  $G_1$  as:

$$G_1(k) = q_k^n + \phi(m) \sum_{i \in F_M^b} \frac{\partial w_i^b}{\partial w_k^n} x_{mi}^b \quad \forall k \in F_M^n$$

Then we can write manufacturers' margins on national brands as:

$$PCM_M^n = - \left( T_M^n \square \Delta_2^n \right)^{-1} G_1 \quad (5)$$

where  $PCM_M^n$  is an  $N_M^n \times 1$  vector of manufacturers' margins on their national brands,

with  $PCM_M^n(j) = (w_j^n - c_j^n) \quad \forall j \in F_M^n$ ,  $\Delta_2^n$  is an  $N_M^n \times N_M^n$  matrix with  $\Delta_2^n(k, j) = \frac{\partial q_j^n}{\partial w_k^n}$

$\forall k, j \in F_M^n$ , and  $T_M^n$  is an  $N_M^n \times N_M^n$  matrix indicating manufacturers' pricing strategies for their national brand. Note that for the category management case,  $T_M^n(i, j) = 1 \quad \forall i, j \in F_M^n$ .

Finally,  $T_M^n \square \Delta_2^n$  is the element by element product of the matrices  $T_M^n$  and  $\Delta_2^n$ .

Next, we turn to manufacturers' margins from private labels, if they supply those.

Equation 3b can be written as:

$$(w_k^b - c_k^b) = - \sum_{i \in F_m^b} \frac{\partial w_i^b}{\partial x_{mk}^b} x_{mi}^b - \sum_{j \in F_m^n} (w_j^n - c_j^n) \frac{\partial q_j^n}{\partial x_{mk}^b}.$$

Define an  $N_M^b \times 1$  matrix  $G_{2m}$  as  $G_{2m}(k) = \sum_{i \in F_m^b} \frac{\partial w_i^b}{\partial x_{mk}^b} x_{mi}^b$  for  $k \in F_M^b$ . Therefore manufacturer

$m$ 's margin from private labels can be written as:

$$PCM_m^b = -G_{2m} - \Delta_{3m} PCM_m^n \quad (6)$$

where  $PCM_m^b$  is an  $N_M^b \times 1$  matrix with  $PCM_m^b(k) = (w_k^b - c_k^b)$  for  $k \in F_M^b$ .  $\Delta_{3m}$  is an

$N_M^b \times N_m^n$  matrix with  $\Delta_{3m}(k, j) = \frac{\partial q_j^n}{\partial x_{mk}^b}$  for  $m \in M$ ,  $k \in F_M^b$  and  $j \in F_m^n$ .

Note that in order to calculate the manufacturer's margin using equation 5 and 6, we need to know  $\Delta_2^n$ ,  $\Delta_{3m}$ ,  $G_1$ , and  $G_{2m}$ . Furthermore, to calculate  $G_1$ , we need to know an  $N_M^n \times N_M^b$

matrix  $\Delta_{w1}(k, i) = \frac{\partial w_i^b}{\partial w_k^n}$  for  $k \in F_M^n$  and  $i \in F_M^b$ . To calculate  $G_{2m}$ , we need to know an

$N_M^b \times N_M^b$  matrix  $\Delta_{w2m}(k, i) = \frac{\partial w_i^b}{\partial x_{mk}^b}$  for  $k \in F_M^b$  and  $i \in F_M^b$ .

First we show how to calculate  $\Delta_2^n$  and  $\Delta_{w1}$ . Notice that  $\Delta_2^n = \Delta_R^n \Delta_{1n}$ , where  $\Delta_R^n$  is an  $N_R \times N_M^n$  matrix with  $\Delta_R^n(i, j) = \frac{dp_i}{dw_j^n}$  for  $i \in F_R$  and  $j \in F_M^n$ , and  $\Delta_{1n}$  is a subset of  $\Delta_1$  with

$\Delta_{1n}(i, j) = \frac{\partial q_j}{\partial p_i}$  for  $j \in F_M^n$  and  $i \in F_R$ .

We fully differentiate equation 1 with respect to a wholesale price  $w_f^n$  for national brand  $f$ . Observing that retail price  $p_k$  and private label's wholesale price  $w_i^b$  are implicit functions of  $w_f^n$ , we get

$$\sum_{k \in F_R} \left[ \frac{\partial q_j}{\partial p_k} + \sum_{i \in F_R} \left[ T_R(i, j) \frac{\partial^2 q_i}{\partial p_j \partial p_k} (p_i - w_i) \right] + T_r(k, j) \frac{\partial q_k}{\partial p_j} \right] \frac{dp_k}{dw_f^n} - \sum_{i \in F_M^b} \frac{\partial w_i^b}{\partial w_f^n} \sum_{r \in R} T_R(ri, j) \frac{\partial q_{ri}}{\partial p_j} - T_R(f, j) \frac{\partial q_f}{\partial p_j} = 0 \quad (7)$$

There are  $N_R$  such equations with  $N_R + N_M^b$  unknowns  $(\frac{dp_k}{dw_f^n}, k=1 \dots N_R, \frac{\partial w_i^b}{\partial w_f^n}, i=1 \dots N_M^b)$ .

For the private label  $i \in F_M^b$ , we have the market clearing constraint,

$$\sum_{m \in M} x_{mi}^b - \sum_{j \in F_R^{bi}} q_j(p(w^n, w^b)) = 0 \quad (8)$$

Fully differentiating equation 8 w.r.t.  $w_f^n$ , we have

$$\sum_{j \in F_R^{bi}} \sum_k \frac{\partial q_j}{\partial p_k} \frac{dp_k}{dw_f^n} = \sum_k \sum_{j \in F_R^{bi}} \frac{\partial q_j}{\partial p_k} \frac{dp_k}{dw_f^n} = 0 \quad (9)$$

This gives us  $N_M^b$  equations.

Combine (7) and (9), define an  $N_R \times N_R$  matrix  $S_1$ ,

$$S_1(j, k) = \frac{\partial q_j}{\partial p_k} + \sum_{i \in F_R} \left[ T_R(i, j) \frac{\partial^2 q_i}{\partial p_j \partial p_k} (p_i - w_i) \right] + T_r(k, j) \frac{\partial q_k}{\partial p_j}$$

$N_R \times N_M^n$  matrix  $S_2$ ,

$$S_2(j, i) = -\sum_{r \in R} T_R(ri, j) \frac{\partial q_{ri}}{\partial p_j}$$

$N_M^n \times N_R$  matrix  $S_3$ ,

$$S_3(i, k) = \sum_{j \in F_R^{bi}} \frac{\partial q_j}{\partial p_k}$$

$(N_R + N_M^n) \times (N_R + N_M^n)$  matrix  $S$ ,

$$S = \begin{pmatrix} S_1 & S_2 \\ S_3 & 0 \end{pmatrix}$$

$N_R \times 1$  matrix  $H_{1f}$ ,

$$H_{1f}(j, 1) = T_R(f, j) \frac{\partial q_f}{\partial p_j}$$

and an  $(N_R + N_M^n) \times 1$  matrix  $H_f$

$$H_f = \begin{bmatrix} H_{1f} \\ 0 \end{bmatrix}$$

where the expression for  $\frac{\partial q_i}{\partial p_k}$  and  $\frac{\partial^2 q_i}{\partial p_j \partial p_k}$  is given later. Then equations 7 and 9 can be written

in matrix form as:

$$S \begin{bmatrix} dp \\ dw_f^n \\ dw_f^b \end{bmatrix} - H_f = 0$$

Therefore

$$\begin{bmatrix} dp \\ dw_f^n \\ dw_f^b \end{bmatrix} = S^{-1} H_f$$

Now we show how to calculate  $\Delta_{3m}$  and  $\Delta_{w2m}$ . We fully differentiate equation 1 with respect to a wholesale price  $x_{mi}^b$  for national brand  $f$ . Observing that retail price  $p_k$  and private label's wholesale price  $w_i^b$  are implicit functions of  $x_{mi}^b$ , we get

$$\sum_{k \in F_R} \left[ \frac{\partial q_j}{\partial p_k} + \sum_{i \in F_R} \left[ T_R(i, j) \frac{\partial^2 q_i}{\partial p_j \partial p_k} (p_i - w_i) \right] + T_R(k, j) \frac{\partial q_k}{\partial p_j} \right] \frac{dp_k}{dx_{mi}^b} - \sum_{i \in F_M^b} \frac{\partial w_i^b}{\partial x_{mi}^b} \sum_{r \in R} T_R(ri, j) \frac{\partial q_{ri}}{\partial p_j} = 0 \quad (10)$$

There are  $N_R$  such equations with  $N_R + N_M^b$  unknowns  $(\frac{dp_k}{dx_{mi}^b}, k=1 \dots N_R, \frac{\partial w_i^b}{\partial x_{mi}^b}, i=1 \dots N_M^b)$ .

For the private label  $l \in F_M^b$ , we have the market clearing constraint,

$$\sum_{m \in M} x_{ml}^b - \sum_{j \in F_R^{bi}} q_j^n \left( p(w^n, w^b) \right) = 0 \quad (11)$$

Fully differentiating equation 11 w.r.t.  $x_{mi}^b$ , we have

$$\begin{aligned} \sum_{j \in F_R^{bi}} \sum_{k \in F_R} \frac{\partial q_j}{\partial p_k} \frac{\partial p_k}{\partial x_{mi}^b} - 1 &= \sum_{k \in F_R} \sum_{j \in F_R^{bi}} \frac{\partial q_j}{\partial p_k} \frac{\partial p_k}{\partial x_{mi}^b} - 1 = 0 & \forall l = i \\ \sum_{j \in F_R^{bi}} \sum_{k \in F_R} \frac{\partial q_j}{\partial p_k} \frac{\partial p_k}{\partial x_{mi}^b} - 0 &= \sum_{k \in F_R} \sum_{j \in F_R^{bi}} \frac{\partial q_j}{\partial p_k} \frac{\partial p_k}{\partial x_{mi}^b} = 0 & \forall l \neq i \end{aligned} \quad (12)$$

This gives us  $N_M^b$  equations.

Combining (10) and (12), we define an  $N_R \times N_R$  matrix  $S_1$ ,

$$S_1(j, k) = \frac{\partial q_j}{\partial p_k} + \sum_{i \in F_R} \left[ T_R(i, j) \frac{\partial^2 q_i}{\partial p_j \partial p_k} (p_i - w_i) \right] + T_R(k, j) \frac{\partial q_k}{\partial p_j}$$

an  $N_M^n \times N_R$  matrix  $S_2$ ,

$$S_2(j, i) = - \sum_{r \in R} T_R(ri, j) \frac{\partial q_{ri}}{\partial p_j}$$

An  $N_M^n \times N_R$  matrix  $S_3$ ,

$$S_3(l, k) = \sum_{j \in F_R^{bl}} \frac{\partial q_j}{\partial p_k}$$

an  $(N_R + N_M^n) \times (N_R + N_M^n)$  matrix  $S$ ,

$$S = \begin{pmatrix} S_1 & S_2 \\ S_3 & 0 \end{pmatrix}$$

An  $N_M^n \times 1$  matrix  $H_1$ ,

$$H_1(j, 1) = 1 \text{ for } j = mi$$

$$H_1(j, 1) = 0 \text{ otherwise.}$$

and an  $(N_R + N_M^n) \times 1$  matrix  $H_{mi}$ ,

$$H_{mi} = \begin{bmatrix} 0 \\ H_1 \end{bmatrix}$$

where the expressions for  $\frac{\partial q_i}{\partial p_k}$  and  $\frac{\partial^2 q_i}{\partial p_j \partial p_k}$  are given later. Equations 10 and 12 can be written

in matrix form as:

$$S \begin{bmatrix} dp \\ dx_{mi}^b \\ dx_{mi}^b \end{bmatrix} - H_{mi} = 0$$

Therefore,

$$\begin{bmatrix} dp \\ dx_{mi}^b \\ dw^b \\ dx_{mi}^b \end{bmatrix} = S^{-1} H_{mi}$$

and

$$\Delta_{3m}(k, j) = \frac{\partial q_j^n}{\partial x_{mk}^b} = \sum_{k \in F_R} \frac{\partial q_j^n}{\partial p_k} \frac{dp_k}{dx_{mk}^b}$$

### TA.3: Market Response Function

The market response functions are given as:

$$\frac{\partial q_j}{\partial p_i} = \frac{\partial \bar{Q}_j}{\partial p_i} \bar{M}$$

where  $\bar{Q}_j$  is the average quantity per person and  $\bar{M}$  is the measure of the market. We have

$$\begin{aligned} \bar{Q}_j &= \int \frac{y_h}{p_j} \frac{\mu \alpha_3}{\alpha_h} \frac{e^v}{\sum e^v} \ln(1 + \sum e^v) \phi(\Lambda) d\Lambda \\ &= \mu \alpha_3 \int \frac{y_h}{\alpha_h} \frac{1}{p_j} \cdot s_{1j} \ln C \cdot \phi(\Lambda) d\Lambda \\ &= \frac{\mu \alpha_3}{N} \sum_{h=1}^N \frac{y_h}{\alpha_h} \frac{1}{p_j} \cdot s_{1j} \ln C \end{aligned}$$

where  $h$  indicates the individual (household),  $s_{1j} = \frac{e^{v_j}}{\sum e^{v_k}}$ ,  $C = 1 + \sum e^{v_k}$ , and

$$s_{2j} = \frac{e^{v_j}}{1 + \sum e^{v_k}}.$$

We can then derive the following expression for  $\frac{\partial \bar{Q}_j}{\partial p_i}$ :

If  $i = j$ :

$$\begin{aligned} \frac{\partial \bar{Q}_j}{\partial p_j} &= \frac{\mu \alpha_3}{N} \sum_{h=1}^N \frac{y_h}{\alpha_h} \left\{ -\frac{1}{p_j^2} s_{1j} \ln C + \frac{1}{p_j} (-\alpha_h) s_{1j} (1 - s_{1j}) \frac{1}{p_j} \ln C + \frac{1}{p_j} s_{1j} \cdot \frac{1}{C} \cdot e^{v_j} \cdot (-\alpha_h) \frac{1}{p_j} \right\} \\ &= -\frac{\mu \alpha_3}{N} \sum_{h=1}^N \frac{y_h}{\alpha_h} \left( \frac{1}{p_j^2} \right) s_{1j} \left\{ \ln C + \alpha_h (1 - s_{1j}) \ln C + s_{2j} \alpha_h \right\} \end{aligned}$$

If  $i \neq j$ :

$$\frac{\partial \bar{Q}_j}{\partial p_i} = \frac{\mu \alpha_3}{N} \sum_{h=1}^N \frac{y_h}{\alpha_h} \left\{ \frac{1}{p_j} \alpha_h s_{1j} s_{1i} \frac{1}{p_i} \ln C + \frac{1}{p_j} s_{1j} s_{2i} (-\alpha_h) \frac{1}{p_i} \right\}$$

$$\begin{aligned}
&= \frac{\mu\alpha_3}{N} \sum_{h=1}^N \frac{y_h}{\alpha_h} \frac{1}{p_i p_j} \alpha_h s_{1j} (s_{1i} \ln C - s_{2i}) \\
&= \frac{\mu\alpha_3}{N} \sum_{h=1}^N \frac{y_h}{p_i p_j} s_{1j} (s_{1i} \ln C - s_{2i})
\end{aligned}$$

Similarly, we can derive the following expression for  $\frac{\partial^2 \bar{Q}_i}{\partial p_j \partial p_k}$  :

If  $i = j = k$  :

$$\begin{aligned}
\frac{\partial^2 \bar{Q}_i}{\partial p_i \partial p_i} &= -\frac{\mu\alpha_3}{N} \sum_{h=1}^N \frac{y_h}{\alpha_h} \left\{ -\frac{2}{p_i^3} s_{1i} [\ln C + \alpha_h (1 - s_{1i}) \ln C + s_{2i} \alpha_h] \right. \\
&+ \frac{1}{p_i^2} (-\alpha_h) s_{1i} (1 - s_{1i}) \frac{1}{p_i} [\ln C + \alpha_h (1 - s_{1i}) \ln C + s_{2i} \alpha_h] \\
&\left. + \frac{s_{1i}}{p_i^2} \left[ s_{2i} (-\alpha_h) \frac{1}{p_i} + \alpha_h \alpha_h s_{1i} (1 - s_{1i}) \frac{1}{p_i} \ln C + \alpha_h (1 - s_{1i}) s_{2i} (-\alpha_h) \frac{1}{p_i} + (-\alpha_h) s_{2i} (1 - s_{2i}) \frac{1}{p_i} \alpha_h \right] \right\}
\end{aligned}$$

If  $i = j$  &  $j \neq k$  :

$$\frac{\partial^2 \bar{Q}_i}{\partial p_i \partial p_k} = -\frac{\alpha_3 \mu}{N} \sum_{h=1}^N \frac{y_h}{\alpha_h} \frac{1}{p_i^2 p_k} \left\{ \alpha_h s_{1i} s_{1k} [\ln C + \alpha_h (1 - s_{1i}) \ln C + \alpha_h s_{2i}] \right. \\
\left. + s_{1i} [-\alpha_h s_{2k} - \alpha_h^2 s_{1i} s_{1k} \ln C - \alpha_h^2 (1 - s_{1i}) s_{2k} + \alpha_h^2 s_{2i} s_{2k}] \right\}$$

If  $i \neq j$  &  $j \neq k$  &  $i \neq k$

$$\frac{\partial^2 \bar{Q}_i}{\partial p_j \partial p_k} = \frac{\alpha_3 \mu}{N} \sum_{h=1}^N y_h \frac{1}{p_i p_j p_k} \left\{ 2\alpha_h s_{1i} s_{1j} s_{1k} \ln C - \alpha_h s_{1i} s_{1j} s_{2k} - \alpha_h s_{1i} s_{2j} s_{1k} - \alpha_h s_{1i} s_{2j} s_{2k} \right\}$$

If  $i \neq j$  &  $i = k$

$$\frac{\partial^2 \bar{Q}_i}{\partial p_j \partial p_i} = -\frac{\alpha_3 \mu}{N} \sum_{h=1}^N \frac{y_h}{\alpha_h} \frac{1}{p_i^2 p_j} \left\{ \alpha_h s_{1i} s_{1j} [\ln C + \alpha_h (1 - s_{1i}) \ln C + \alpha_h s_{2i}] \right. \\
\left. + s_{1i} [-\alpha_h s_{2j} - \alpha_h^2 s_{1i} s_{1j} \ln C - \alpha_h^2 (1 - s_{1i}) s_{2j} + \alpha_h^2 s_{2i} s_{2j}] \right\}$$

If  $i \neq j$  &  $j = k$

$$\frac{\partial^2 \bar{Q}_i}{\partial p_j \partial p_j} = -\frac{\alpha_3 \mu}{N} \sum_{h=1}^N y_h \frac{1}{p_i p_j^2} \left\{ -s_{1i} [s_{1j} \ln C - s_{2j}] + \alpha_h s_{1i} s_{1j} [s_{1j} \ln C - s_{2j}] \right. \\
\left. + s_{1i} [-\alpha_h s_{1j} (1 - s_{1j}) \ln C - \alpha_h s_{1i} s_{2j} + \alpha_h s_{2j} (1 - s_{2i})] \right\}$$

## PICKING APPROPRIATE GAME FORM

Recall that we had specified and estimated a number of possible competitive interactions and retailer behaviors. It is important at this stage to decide the most appropriate ‘game form’. Prior literature has employed various ways of picking across games, including i) a conduct parameter approach, with estimated values of the conduct parameter suggesting the appropriate game (Bresnahan 1989; Kadiyali et al. 2000); ii) statistical fit tests, such as the Vuong (1989) or Smith (1992) tests (e.g., Sudhir 2001); iii) data patterns that pin down the nature of the game form (Porter 1983); and iv) a comparison of the margins/costs predicted by various models with those obtained externally (Nevo 2001). The key issue is whether there is sufficient information in the data to pin down *both* the nature of competitive interaction (and hence the price-cost margins) and the marginal cost. As Reiss and Wolak (2007) point out, this is almost never the case. With regard to the first alternative, various authors have suggested fundamental problems with the interpretation of the conduct parameters, and with the data requirements for identification in differentiated product markets (Corts 1999; Nevo 2001). Statistical testing is also problematic – among other issues, these tests are not transitive, which means that we can have a situation where model A dominates model B, model B dominates model C, but model C dominates model A. Finding data patterns to identify the nature of the game is extremely hard in practice. This leaves the last alternative, which is in many ways the most attractive, but one that requires valid external information.

Fortunately, we do have access to external information on average margins at the retailer and manufacturer level for a number of milk producers in the same geographical region as our data. We therefore follow Nevo (2001) closely, comparing the predicted margins from each of the possible game forms we estimate to these external numbers, and picking the game that gives us numbers closest to the external value.

Because of the complexity of the vertical and horizontal interactions that we model, the comparison of estimated margins to actual margins is fairly involved. To recap, the focus here is on comparing our *proposed model*, where PL products are homogenous upstream (Cournot-Nash) and differentiated downstream (Bertrand-Nash), with the *alternative model* where PL products are differentiated both upstream and downstream (Bertrand-Nash). In addition, we wish to distinguish between three possible forms of manufacturer and retailer behavior. Before we proceed, it is useful to set some nomenclature. We define a ‘product’ upstream as consisting of the identity of the manufacturer ( $M1$ ,  $M2$ ), the ‘brand’ (NL, PL), and the type (skim, whole). Downstream the definition is similar, except that the identity of the retailer is also relevant for PL products. Examples of upstream products include: NL skim milk from  $M2$ , PL whole milk from

*M1*, etc. Equivalent downstream products, at say *R2*, would be NL skim milk from *M1* and *M2*, and PL whole milk.

With this in place, we outline the three possible forms of manufacturer and retailer behavior. i) *Product management*, wherein the manufacturer (retailer) maximizes profits separately for each ‘product’ in his portfolio. ii) *Account management*, wherein the manufacturer (retailer) maximizes profits for NL products (viewed as one account) separately from PL products (viewed as a different account). As an example, upstream, *M1* would maximize profits for its NL skim and whole milk jointly, but separate from its PL skim and whole milk. Downstream, retailer *R2* would maximize profits jointly for NL products such as *M1* skim and whole, and *M2* skim and whole, but separate from its own PL skim and whole milk products. iii) *Category management*, wherein the manufacturer (retailer) maximizes joint profits across all products.

This gives us a total of 18 games to pick from – nine for the proposed model and identically nine for the alternative. For each game we estimate three margins (total, retailer, and manufacturer) giving us a total of 54 margins (18 x 3). Table TA1 displays all the estimated margins, along with confidence intervals. Cells where the true value of the margin falls within the estimated confidence interval are bolded, to highlight that this mode of conduct is indistinguishable statistically from the ‘true’ behavior. Note that there is only one game for which all three margins are bolded – this is the proposed model with both manufacturers and retailers practicing account management. To reiterate, the best fitting game is one where i) PL products compete Cournot-Nash upstream and Bertrand-Nash downstream; ii) NL products compete Bertrand-Nash both upstream and downstream; iii) both manufacturers and retailers practice account management, i.e., they separately maximize profits for NL and PL products. This is the game we use in all subsequent analyses.

**Table TA1: Supply Model Selection**

| Proposed Model    |              |                                   |                                   |                                   |
|-------------------|--------------|-----------------------------------|-----------------------------------|-----------------------------------|
|                   |              | Manufacturer Category             | Manufacturer Account              | Manufacturer Product              |
| Retailer_Category | Total        | <b>62.7</b><br><b>(62.1,63.5)</b> | 62.4<br>(61.7,63.2)               | 61.9<br>(61.2,62.8)               |
|                   | Retailer     | <b>40.5</b><br><b>(39.9,41.1)</b> | <b>40.5</b><br><b>(39.9,41.1)</b> | <b>40.5</b><br><b>(39.9,41.1)</b> |
|                   | Manufacturer | 22.3<br>(22.1,22.4)               | 21.9<br>(21.7,22.1)               | 21.5<br>(21.2,21.8)               |
| Retailer_Account  | Total        | <b>63.1</b><br><b>(62.5,63.9)</b> | <b>62.8</b><br><b>(62.2,63.7)</b> | 62.3<br>(61.6,63.2)               |
|                   | Retailer     | <b>40.1</b><br><b>(39.6,40.8)</b> | <b>40.1</b><br><b>(39.6,40.8)</b> | <b>40.1</b><br><b>(39.6,40.8)</b> |
|                   | Manufacturer | 23.0<br>(22.8,23.1)               | <b>22.7</b><br><b>(22.6,22.9)</b> | 22.2<br>(22.0,22.4)               |
| Retailer_Product  | Total        | <b>63.2</b><br><b>(62.6,64.0)</b> | <b>63.0</b><br><b>(62.3,63.8)</b> | 62.2<br>(61.4,63.0)               |
|                   | Retailer     | 39.9<br>(39.3,40.5)               | 39.9<br>(39.3,40.5)               | 39.9<br>(39.3,40.5)               |
|                   | Manufacturer | 23.3<br>(23.2,23.5)               | <b>23.1</b><br><b>(22.9,23.3)</b> | 22.3<br>(22.1,22.5)               |
| Alternative Model |              |                                   |                                   |                                   |
| Retailer_Category | Total        | <b>63.1</b><br><b>(62.3,63.7)</b> | <b>62.6</b><br><b>(61.7,63.4)</b> | 62.1<br>(61.4,63.0)               |
|                   | Retailer     | <b>40.5</b><br><b>(39.9,41.1)</b> | <b>40.5</b><br><b>(39.9,41.1)</b> | <b>40.5</b><br><b>(39.9,41.1)</b> |
|                   | Manufacturer | 22.6<br>(22.4,22.6)               | 22.1<br>(21.9,22.3)               | 21.7<br>(21.4,22.0)               |
| Retailer_Account  | Total        | <b>63.5</b><br><b>(62.8,64.3)</b> | <b>63.2</b><br><b>(62.6,64.0)</b> | <b>62.4</b><br><b>(61.7,63.3)</b> |
|                   | Retailer     | <b>40.1</b><br><b>(39.6,40.8)</b> | <b>40.1</b><br><b>(39.6,40.8)</b> | <b>40.1</b><br><b>(39.6,40.8)</b> |
|                   | Manufacturer | 23.3<br>(23.2,23.5)               | 23.1<br>(23.0,23.2)               | 22.3<br>(22.1,22.5)               |
| Retailer_Product  | Total        | <b>63.7</b><br><b>(63.0,64.5)</b> | <b>63.2</b><br><b>(62.5,64.0)</b> | <b>62.9</b><br><b>(62.2,63.7)</b> |
|                   | Retailer     | 39.9<br>(39.3,40.5)               | 39.9<br>(39.3,40.5)               | 39.9<br>(39.3,40.5)               |
|                   | Manufacturer | 23.8<br>(23.6,23.9)               | 23.3<br>(23.2,23.5)               | 23.0<br>(22.8,23.1)               |

i) Proposed Model: PL products homogeneous upstream and differentiated downstream; NL differentiated upstream and downstream.

Alternative Model: PL products differentiated both upstream and downstream; NL differentiated upstream and downstream.

ii) Reported numbers are median margins, with the 95% confidence interval in parenthesis.

iii) Numbers are bolded when the confidence interval covers the observed value from external data. The best fitting game has values italicized and bolded.

iv) Observed average margins (external data): Total 63.3%, Retailer 40.6%; Manufacturer 22.7%.

**Table TA2: Price Elasticity Matrix**

|    |    | R1      |         |         | R2     |        |         | R3      |         |         | R4      |         |         | R5      |         |         |
|----|----|---------|---------|---------|--------|--------|---------|---------|---------|---------|---------|---------|---------|---------|---------|---------|
|    |    | M1      | M2      | P       | M1     | M2     | P       | M1      | M2      | P       | M1      | M2      | P       | M1      | M2      | P       |
| R1 | M1 | -2.0878 | 0.0160  | 0.0333  | 0.0273 | 0.0085 | 0.0262  | 0.0018  | 0.0004  | 0.001   | 0.0174  | 0.0057  | 0.0228  | 0.0014  | 0.0003  | 0.0007  |
|    | M2 | 0.0363  | -2.1981 | 0.0475  | 0.0163 | 0.0091 | 0.0343  | 0.0009  | 0.0002  | 0.0006  | 0.0131  | 0.0093  | 0.0389  | 0.0008  | 0.0002  | 0.0004  |
|    | P  | 0.0251  | 0.0158  | -2.2460 | 0.0132 | 0.0090 | 0.0551  | 0.0005  | 0.0001  | 0.0005  | 0.0135  | 0.0099  | 0.0623  | 0.0004  | 0.0001  | 0.0003  |
| R2 | M1 | 0.0545  | 0.0143  | 0.0350  | -2.182 | 0.0085 | 0.0359  | 0.0018  | 0.0005  | 0.0024  | 0.0169  | 0.0058  | 0.0308  | 0.0016  | 0.0004  | 0.002   |
|    | M2 | 0.0341  | 0.0160  | 0.0476  | 0.0170 | -2.289 | 0.0478  | 0.0011  | 0.0004  | 0.0029  | 0.0140  | 0.0089  | 0.0480  | 0.0011  | 0.0003  | 0.0025  |
|    | P  | 0.0155  | 0.0090  | 0.0434  | 0.0107 | 0.0071 | -2.4823 | 0.0006  | 0.0003  | 0.0102  | 0.0110  | 0.0071  | 0.0582  | 0.0007  | 0.0003  | 0.0085  |
| R3 | M1 | 0.0062  | 0.0014  | 0.0022  | 0.0031 | 0.0009 | 0.0035  | -3.1775 | 0.0238  | 0.0432  | 0.0015  | 0.0003  | 0.0007  | 0.0828  | 0.0320  | 0.0461  |
|    | M2 | 0.0030  | 0.0007  | 0.0011  | 0.0017 | 0.0007 | 0.0038  | 0.0483  | -3.2206 | 0.0474  | 0.0007  | 0.0002  | 0.0003  | 0.0830  | 0.0334  | 0.0508  |
|    | P  | 0.0013  | 0.0003  | 0.0008  | 0.0016 | 0.0010 | 0.0229  | 0.0167  | 0.0090  | -3.0021 | 0.0003  | 0.0001  | 0.0002  | 0.0270  | 0.0113  | 0.0598  |
| R4 | M1 | 0.0462  | 0.0154  | 0.0477  | 0.0226 | 0.0093 | 0.0492  | 0.0011  | 0.0003  | 0.0006  | -2.1753 | 0.008   | 0.0511  | 0.0009  | 0.0002  | 0.0004  |
|    | M2 | 0.0265  | 0.0192  | 0.0616  | 0.0135 | 0.0104 | 0.0555  | 0.0004  | 0.0001  | 0.0002  | 0.0141  | -2.2557 | 0.0647  | 0.0003  | 0.0001  | 0.0002  |
|    | P  | 0.0193  | 0.0145  | 0.0699  | 0.0131 | 0.0102 | 0.0827  | 0.0002  | 0.0000  | 0.0001  | 0.0162  | 0.0117  | -2.2766 | 0.0001  | 0.0000  | 0.0001  |
| R5 | M1 | 0.0032  | 0.0008  | 0.0012  | 0.0018 | 0.0006 | 0.0026  | 0.0540  | 0.0267  | 0.0456  | 0.0007  | 0.0002  | 0.0003  | -3.2598 | 0.0360  | 0.0489  |
|    | M2 | 0.0016  | 0.0004  | 0.0007  | 0.0011 | 0.0005 | 0.0029  | 0.0529  | 0.0272  | 0.0485  | 0.0004  | 0.0001  | 0.0002  | 0.0912  | -3.2828 | 0.0523  |
|    | P  | 0.0009  | 0.0002  | 0.0007  | 0.0014 | 0.0009 | 0.0202  | 0.0188  | 0.0102  | 0.0630  | 0.0002  | 0.0000  | 0.0002  | 0.0305  | 0.0129  | -3.0458 |

**Note:**

1. The matrix is for skim milk only. The complete matrix for skim and whole milk is available from the authors.
2. An element in the  $i$ th row and  $j$ th column represents the percentage change in  $i$ 's quantity as a result of a 1% change in  $j$ 's price.

## REFERENCES

- Corts, Kenneth (1999), "Conduct Parameters and the Measurement of Market Power," *Journal of Econometrics*, 88(2), 227-250.
- Kadiyali, Vrinda, Pradeep Chintagunta, and Naufel Vilcassim (2000), "Manufacturer-Retailer Channel Interactions and Implications for Channel Power: An Empirical Investigation of Pricing in a Local Market," *Marketing Science*, 19 (Spring), 127-148.
- Porter, Robert (1983), "A Study of Cartel Stability: The Joint Executive Committee, 1880-1886," *The Bell Journal of Economics*, 14(2), 301-14.
- Reiss, Peter C. and Wolak, Frank A. (2007) "Structural Econometric Modeling: Rationales and Examples from Industrial Organization," *Handbook of Econometrics*, Volume 6A, (James J. Heckman and Edward E. Leamer eds.), 4277-4415.
- Smith, Richard (1992), "Non-nested Tests for Competing Models Estimated by Generalized Method of Moments," *Econometrica*, 60, 973-980.
- Vuong, Q.H. (1989), "Likelihood Ratio Tests for Model Selection and Non-Nested Hypotheses", *Econometrica*, 57(March), 307-333.
